# Supplementary material for: Radiomic feature clusters and Prognostic Signatures specific for Lung and Head & Neck cancer
Source: PubMed Central journal article supplement (PMC4937496; doi:10.1038/srep11044), 2015-06-05
Supplement: srep11044-s1.pdf [file srep11044-s1.pdf]

# Radiomic feature clusters and Prognostic Signatures specific for Lung and Head & Neck cancer

Chintan Parmar<sup>1,3,4,#,\*</sup>, Ralph T. H. Leijenaar<sup>3,#</sup>, Patrick Grossmann<sup>1,5</sup>, Emmanuel Rios Velazquez<sup>1</sup>,  
Johan Bussink<sup>6</sup>, Derek Rietveld<sup>7</sup>, Michelle M. Rietbergen<sup>8</sup>, Benjamin Haibe-Kains<sup>9,10</sup>, Philippe  
Lambin<sup>2</sup>,  
Hugo J.W.L. Aerts<sup>1,2,5,\*</sup>

*Departments of <sup>1</sup>Radiation Oncology and <sup>2</sup>Radiology, Dana-Farber Cancer Institute, Brigham and Women's Hospital, Harvard Medical School, Boston, MA, USA, <sup>3</sup>Radiation Oncology (MAASTRO), Research Institute GROW, Maastricht University, Maastricht, the Netherlands, <sup>4</sup>Machine Intelligence Unit, Indian Statistical Institute, Kolkata, India, <sup>5</sup>Department of Biostatistics & Computational Biology, Dana-Farber Cancer Institute, Boston, MA, USA, <sup>6</sup>Department of Radiation Oncology, Radboud University Medical Center, Nijmegen, the Netherlands, <sup>7</sup>Department of Radiation Oncology, VU University Medical Center, Amsterdam, The Netherlands, <sup>8</sup>Department of Otolaryngology/Head and Neck Surgery, VU University Medical Center, Amsterdam, The Netherlands, <sup>9</sup>Ontario Cancer Institute, Princess Margaret Cancer Centre, University Health Network, Toronto, Ontario, Canada, <sup>10</sup>Medical Biophysics Department, University of Toronto, Toronto, Ontario, Canada*

#Equal contribution

Subject areas:

QUANTITATIVE IMAGING, RADIOLOGY, RADIOMICS, CANCER, COMPUTATIONAL SCIENCE

## **CORRESPONDING AUTHORS**

Hugo Aerts, PhD

Dana-Farber Cancer Institute, Brigham and  
Women's Hospital, Harvard Medical School

450 Brookline Ave, JF518, Boston,

MA 02115-5450, P - 617.525.7156,

F - 617.582.6037

Email: [Hugo\\_Aerts@dfci.harvard.edu](mailto:Hugo_Aerts@dfci.harvard.edu)

Chintan Parmar, MTech.

Dana-Farber Cancer Institute

450 Brookline Ave, JF518, Boston, MA

02115-5450,

P - 617.525.7156,

F – 617.582.6037

Email: [Chintan\\_Parmar@dfci.harvard.edu](mailto:Chintan_Parmar@dfci.harvard.edu)

## Supplementary Information

Figure S1

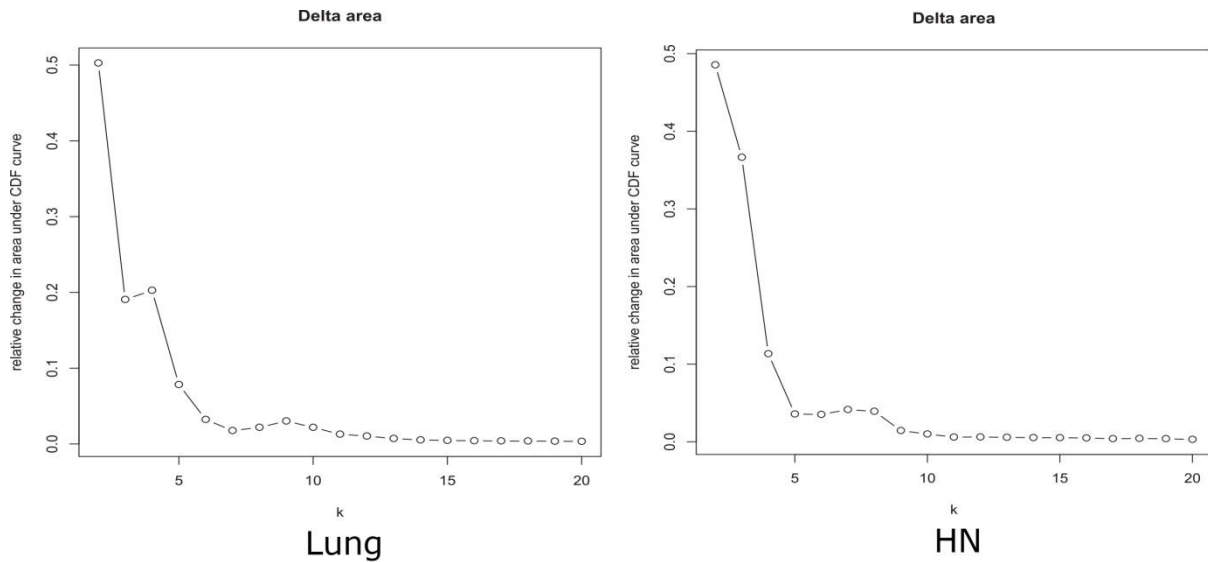

Consensus clustering delta area plots for the Lung1 (left) and HN1 (right) radiomic cohorts. It can be observed that for both Lung1 and HN1 cohorts, the relative change in the area under CDF curves (y-axis) approximately converges to minimum at 10 or more number of clusters (x-axis). Therefore, we chose the number of cluster, which is  $\geq 10$  and which gave the highest median cluster consensus over all clusters.

## Supplementary Table- ST1

Supplementary table listing all the radiomic features along with the corresponding Lung and HN cluster number and CI values.

| Serial No. | FeatureName                   | Lung Cluster Number | Lung CI | Lung CI rank | HN Cluster Number | HN CI | HN CI rank |
|------------|-------------------------------|---------------------|---------|--------------|-------------------|-------|------------|
| 1          | GLCM_autocorr                 | 1                   | 0.57    | 247          | 1                 | 0.64  | 152        |
| 2          | GLCM_clusProm                 | 2                   | 0.51    | 434          | 2                 | 0.61  | 185        |
| 3          | GLCM_clusShade                | 3                   | 0.50    | 437          | 3                 | 0.54  | 331        |
| 4          | GLCM_clusTend                 | 2                   | 0.54    | 398          | 4                 | 0.58  | 228        |
| 5          | GLCM_contrast                 | 4                   | 0.58    | 192          | 4                 | 0.53  | 347        |
| 6          | GLCM_correl1                  | 1                   | 0.56    | 303          | 1                 | 0.65  | 145        |
| 7          | GLCM_diffEntro                | 4                   | 0.59    | 104          | 4                 | 0.53  | 356        |
| 8          | GLCM_dissimilar               | 4                   | 0.58    | 128          | 4                 | 0.51  | 407        |
| 9          | GLCM_energy                   | 5                   | 0.58    | 204          | 5                 | 0.54  | 333        |
| 10         | GLCM_entrop2                  | 4                   | 0.57    | 242          | 4                 | 0.53  | 346        |
| 11         | GLCM_homogeneity1             | 1                   | 0.59    | 124          | 5                 | 0.57  | 243        |
| 12         | GLCM_homogeneity2             | 1                   | 0.58    | 131          | 5                 | 0.57  | 252        |
| 13         | GLCM_infoCorr1                | 1                   | 0.55    | 367          | 6                 | 0.53  | 355        |
| 14         | GLCM_infoCorr2                | 4                   | 0.56    | 289          | 4                 | 0.52  | 363        |
| 15         | GLCM_invDiffmomnor            | 1                   | 0.59    | 78           | 6                 | 0.70  | 18         |
| 16         | GLCM_invDiffnorm              | 1                   | 0.59    | 59           | 6                 | 0.70  | 17         |
| 17         | GLCM_inverseVar               | 1                   | 0.59    | 117          | 6                 | 0.52  | 362        |
| 18         | GLCM_maxProb                  | 5                   | 0.57    | 254          | 5                 | 0.55  | 281        |
| 19         | GLCM_sumAvg                   | 1                   | 0.57    | 263          | 1                 | 0.63  | 161        |
| 20         | GLCM_sumEntro                 | 4                   | 0.57    | 223          | 4                 | 0.53  | 344        |
| 21         | GLCM_sumSquares               | 1                   | 0.57    | 258          | 1                 | 0.64  | 151        |
| 22         | GLCM_sumVar                   | 1                   | 0.57    | 249          | 1                 | 0.64  | 154        |
| 23         | RLGL_grayLevelNonuniformity   | 6                   | 0.61    | 8            | 7                 | 0.67  | 98         |
| 24         | RLGL_highGrayLevelRunEmphasis | 1                   | 0.57    | 230          | 1                 | 0.64  | 150        |

|    |                               |   |      |     |    |      |     |
|----|-------------------------------|---|------|-----|----|------|-----|
| 25 | RLGL_longRunEmphasis          | 5 | 0.58 | 167 | 5  | 0.62 | 178 |
| 26 | RLGL_longRunHighGrayLevEmpha  | 5 | 0.58 | 175 | 1  | 0.66 | 120 |
| 27 | RLGL_longRunLowGrayLevEmpha   | 2 | 0.53 | 407 | 8  | 0.54 | 309 |
| 28 | RLGL_lowGrayLevelRunEmphasis  | 2 | 0.55 | 359 | 8  | 0.66 | 127 |
| 29 | RLGL_runLengthNonuniformity   | 6 | 0.60 | 37  | 7  | 0.68 | 39  |
| 30 | RLGL_runPercentage            | 4 | 0.58 | 135 | 9  | 0.62 | 175 |
| 31 | RLGL_shortRunEmphasis         | 4 | 0.59 | 113 | 9  | 0.61 | 191 |
| 32 | RLGL_shortRunHighGrayLevEmpha | 1 | 0.56 | 338 | 1  | 0.57 | 242 |
| 33 | RLGL_shortRunLowGrayLevEmpha  | 2 | 0.56 | 332 | 8  | 0.67 | 94  |
| 34 | Shape_compactness             | 6 | 0.60 | 25  | 7  | 0.68 | 75  |
| 35 | Shape_compactness2            | 3 | 0.55 | 354 | 8  | 0.58 | 218 |
| 36 | Shape_maxDiameter             | 6 | 0.60 | 43  | 7  | 0.68 | 54  |
| 37 | Shape_spherDisprop            | 1 | 0.55 | 356 | 10 | 0.59 | 216 |
| 38 | Shape_sphericity              | 3 | 0.55 | 355 | 8  | 0.58 | 223 |
| 39 | Shape_surfVolRatio            | 4 | 0.60 | 52  | 8  | 0.67 | 104 |
| 40 | Shape_surface                 | 6 | 0.60 | 31  | 7  | 0.68 | 32  |
| 41 | Shape_volume                  | 1 | 0.53 | 406 | 7  | 0.68 | 53  |
| 42 | Stats_energy                  | 6 | 0.61 | 15  | 7  | 0.68 | 65  |
| 43 | Stats_entropy                 | 4 | 0.58 | 180 | 4  | 0.50 | 440 |
| 44 | Stats_kurtosis                | 5 | 0.58 | 190 | 5  | 0.58 | 225 |
| 45 | Stats_max                     | 7 | 0.57 | 225 | 2  | 0.66 | 124 |
| 46 | Stats_md                      | 2 | 0.56 | 311 | 4  | 0.52 | 368 |
| 47 | Stats_mean                    | 1 | 0.58 | 139 | 3  | 0.51 | 421 |
| 48 | Stats_median                  | 1 | 0.61 | 5   | 3  | 0.50 | 424 |
| 49 | Stats_min                     | 3 | 0.54 | 397 | 8  | 0.66 | 111 |
| 50 | Stats_range                   | 7 | 0.57 | 245 | 2  | 0.66 | 117 |
| 51 | Stats_rms                     | 1 | 0.59 | 85  | 3  | 0.53 | 337 |
| 52 | Stats_skewness                | 4 | 0.56 | 293 | 3  | 0.52 | 382 |
| 53 | Stats_std                     | 2 | 0.54 | 380 | 4  | 0.57 | 258 |
| 54 | Stats_totalenergy             | 6 | 0.61 | 17  | 7  | 0.68 | 61  |
| 55 | Stats_uniformity              | 5 | 0.58 | 147 | 5  | 0.54 | 320 |

|    |                                          |    |      |     |    |      |     |
|----|------------------------------------------|----|------|-----|----|------|-----|
| 56 | Stats_var                                | 2  | 0.54 | 379 | 4  | 0.57 | 257 |
| 57 | Wavelet_HHH_glcm_autocorr                | 7  | 0.56 | 305 | 2  | 0.68 | 44  |
| 58 | Wavelet_HHH_glcm_clusProm                | 8  | 0.54 | 383 | 4  | 0.61 | 194 |
| 59 | Wavelet_HHH_glcm_clusShade               | 9  | 0.51 | 431 | 10 | 0.52 | 367 |
| 60 | Wavelet_HHH_glcm_clusTend                | 8  | 0.56 | 328 | 4  | 0.54 | 307 |
| 61 | Wavelet_HHH_glcm_contrast                | 8  | 0.56 | 334 | 4  | 0.55 | 297 |
| 62 | Wavelet_HHH_glcm_correl1                 | 9  | 0.54 | 389 | 10 | 0.54 | 311 |
| 63 | Wavelet_HHH_glcm_diffEntro               | 8  | 0.56 | 339 | 4  | 0.54 | 306 |
| 64 | Wavelet_HHH_glcm_dissimilar              | 8  | 0.56 | 325 | 4  | 0.54 | 332 |
| 65 | Wavelet_HHH_glcm_energy                  | 10 | 0.54 | 386 | 11 | 0.56 | 270 |
| 66 | Wavelet_HHH_glcm_entrop2                 | 8  | 0.53 | 405 | 4  | 0.59 | 210 |
| 67 | Wavelet_HHH_glcm_homogeneity1            | 5  | 0.56 | 326 | 11 | 0.53 | 354 |
| 68 | Wavelet_HHH_glcm_homogeneity2            | 5  | 0.56 | 330 | 11 | 0.53 | 357 |
| 69 | Wavelet_HHH_glcm_infoCorr1               | 1  | 0.59 | 75  | 6  | 0.63 | 167 |
| 70 | Wavelet_HHH_glcm_infoCorr2               | 4  | 0.60 | 42  | 9  | 0.58 | 229 |
| 71 | Wavelet_HHH_glcm_invDiffmomnor           | 1  | 0.59 | 95  | 6  | 0.72 | 12  |
| 72 | Wavelet_HHH_glcm_invDiffnorm             | 1  | 0.59 | 122 | 6  | 0.67 | 91  |
| 73 | Wavelet_HHH_glcm_inverseVar              | 5  | 0.56 | 336 | 11 | 0.51 | 393 |
| 74 | Wavelet_HHH_glcm_maxProb                 | 10 | 0.53 | 411 | 11 | 0.56 | 275 |
| 75 | Wavelet_HHH_glcm_sumAvg                  | 7  | 0.56 | 307 | 2  | 0.68 | 46  |
| 76 | Wavelet_HHH_glcm_sumEntro                | 8  | 0.56 | 340 | 4  | 0.55 | 300 |
| 77 | Wavelet_HHH_glcm_sumSquares              | 7  | 0.56 | 318 | 2  | 0.68 | 56  |
| 78 | Wavelet_HHH_glcm_sumVar                  | 7  | 0.56 | 301 | 2  | 0.68 | 45  |
| 79 | Wavelet_HHH_rgl_grayLevelNonuniformity   | 6  | 0.61 | 7   | 7  | 0.67 | 100 |
| 80 | Wavelet_HHH_rgl_highGrayLevelRunEmphasis | 7  | 0.56 | 315 | 2  | 0.68 | 57  |
| 81 | Wavelet_HHH_rgl_longRunEmphasis          | 10 | 0.57 | 237 | 11 | 0.52 | 387 |
| 82 | Wavelet_HHH_rgl_longRunHighGrayLevEmpha  | 10 | 0.57 | 262 | 2  | 0.68 | 55  |
| 83 | Wavelet_HHH_rgl_longRunLowGrayLevEmpha   | 3  | 0.56 | 319 | 8  | 0.70 | 19  |
| 84 | Wavelet_HHH_rgl_lowGrayLevelRunEmphasis  | 3  | 0.57 | 220 | 8  | 0.73 | 8   |
| 85 | Wavelet_HHH_rgl_runLengthNonuniformity   | 6  | 0.60 | 33  | 7  | 0.68 | 40  |
| 86 | Wavelet_HHH_rgl_runPercentage            | 8  | 0.57 | 234 | 4  | 0.51 | 396 |

|     |                                          |    |      |     |    |      |     |
|-----|------------------------------------------|----|------|-----|----|------|-----|
| 87  | Wavelet_HHH_rgl_shortRunEmphasis         | 8  | 0.57 | 232 | 4  | 0.51 | 394 |
| 88  | Wavelet_HHH_rgl_shortRunHighGrayLevEmpha | 7  | 0.56 | 342 | 2  | 0.68 | 63  |
| 89  | Wavelet_HHH_rgl_shortRunLowGrayLevEmpha  | 3  | 0.58 | 207 | 8  | 0.77 | 3   |
| 90  | Wavelet_HHH_stats_energy                 | 6  | 0.60 | 53  | 7  | 0.67 | 102 |
| 91  | Wavelet_HHH_stats_entropy                | 8  | 0.56 | 310 | 4  | 0.54 | 330 |
| 92  | Wavelet_HHH_stats_kurtosis               | 10 | 0.55 | 369 | 2  | 0.64 | 149 |
| 93  | Wavelet_HHH_stats_max                    | 10 | 0.57 | 266 | 2  | 0.58 | 226 |
| 94  | Wavelet_HHH_stats_md                     | 11 | 0.52 | 422 | 9  | 0.59 | 215 |
| 95  | Wavelet_HHH_stats_mean                   | 3  | 0.52 | 421 | 10 | 0.52 | 380 |
| 96  | Wavelet_HHH_stats_median                 | 3  | 0.50 | 440 | 10 | 0.51 | 417 |
| 97  | Wavelet_HHH_stats_min                    | 9  | 0.56 | 287 | 12 | 0.60 | 199 |
| 98  | Wavelet_HHH_stats_range                  | 10 | 0.57 | 253 | 2  | 0.60 | 203 |
| 99  | Wavelet_HHH_stats_rms                    | 11 | 0.51 | 427 | 9  | 0.57 | 245 |
| 100 | Wavelet_HHH_stats_skewness               | 9  | 0.53 | 413 | 10 | 0.54 | 326 |
| 101 | Wavelet_HHH_stats_std                    | 11 | 0.51 | 429 | 9  | 0.57 | 246 |
| 102 | Wavelet_HHH_stats_totalenergy            | 6  | 0.60 | 58  | 7  | 0.67 | 101 |
| 103 | Wavelet_HHH_stats_uniformity             | 5  | 0.56 | 317 | 11 | 0.53 | 351 |
| 104 | Wavelet_HHH_stats_var                    | 11 | 0.51 | 428 | 9  | 0.57 | 248 |
| 105 | Wavelet_HHL_glcm_autocorr                | 7  | 0.56 | 308 | 2  | 0.68 | 67  |
| 106 | Wavelet_HHL_glcm_clusProm                | 8  | 0.56 | 300 | 4  | 0.57 | 238 |
| 107 | Wavelet_HHL_glcm_clusShade               | 9  | 0.54 | 394 | 10 | 0.55 | 286 |
| 108 | Wavelet_HHL_glcm_clusTend                | 8  | 0.58 | 134 | 4  | 0.52 | 391 |
| 109 | Wavelet_HHL_glcm_contrast                | 8  | 0.58 | 158 | 4  | 0.52 | 376 |
| 110 | Wavelet_HHL_glcm_correl1                 | 9  | 0.55 | 352 | 10 | 0.55 | 293 |
| 111 | Wavelet_HHL_glcm_diffEntro               | 8  | 0.59 | 107 | 4  | 0.50 | 437 |
| 112 | Wavelet_HHL_glcm_dissimilar              | 8  | 0.59 | 120 | 4  | 0.50 | 433 |
| 113 | Wavelet_HHL_glcm_energy                  | 5  | 0.58 | 149 | 11 | 0.50 | 430 |
| 114 | Wavelet_HHL_glcm_entrop2                 | 8  | 0.58 | 173 | 4  | 0.54 | 327 |
| 115 | Wavelet_HHL_glcm_homogeneity1            | 5  | 0.58 | 137 | 11 | 0.51 | 404 |
| 116 | Wavelet_HHL_glcm_homogeneity2            | 5  | 0.58 | 148 | 11 | 0.51 | 402 |
| 117 | Wavelet_HHL_glcm_infoCorr1               | 1  | 0.58 | 143 | 6  | 0.61 | 195 |

|     |                                          |    |      |     |    |      |     |
|-----|------------------------------------------|----|------|-----|----|------|-----|
| 118 | Wavelet_HHL_glcm_infoCorr2               | 4  | 0.60 | 45  | 9  | 0.57 | 253 |
| 119 | Wavelet_HHL_glcm_invDiffmomnor           | 1  | 0.61 | 2   | 6  | 0.68 | 73  |
| 120 | Wavelet_HHL_glcm_invDiffnorm             | 1  | 0.60 | 21  | 6  | 0.66 | 110 |
| 121 | Wavelet_HHL_glcm_inverseVar              | 5  | 0.59 | 123 | 3  | 0.57 | 244 |
| 122 | Wavelet_HHL_glcm_maxProb                 | 5  | 0.57 | 224 | 11 | 0.51 | 413 |
| 123 | Wavelet_HHL_glcm_sumAvg                  | 7  | 0.56 | 306 | 2  | 0.68 | 62  |
| 124 | Wavelet_HHL_glcm_sumEntro                | 8  | 0.59 | 90  | 4  | 0.50 | 438 |
| 125 | Wavelet_HHL_glcm_sumSquares              | 7  | 0.56 | 329 | 2  | 0.68 | 59  |
| 126 | Wavelet_HHL_glcm_sumVar                  | 7  | 0.56 | 297 | 2  | 0.68 | 64  |
| 127 | Wavelet_HHL_rgl_grayLevelNonuniformity   | 6  | 0.61 | 3   | 7  | 0.67 | 92  |
| 128 | Wavelet_HHL_rgl_highGrayLevelRunEmphasis | 7  | 0.56 | 337 | 2  | 0.68 | 58  |
| 129 | Wavelet_HHL_rgl_longRunEmphasis          | 5  | 0.58 | 161 | 11 | 0.54 | 323 |
| 130 | Wavelet_HHL_rgl_longRunHighGrayLevEmpha  | 10 | 0.58 | 157 | 2  | 0.69 | 27  |
| 131 | Wavelet_HHL_rgl_longRunLowGrayLevEmpha   | 3  | 0.55 | 368 | 8  | 0.68 | 60  |
| 132 | Wavelet_HHL_rgl_lowGrayLevelRunEmphasis  | 3  | 0.57 | 226 | 8  | 0.70 | 16  |
| 133 | Wavelet_HHL_rgl_runLengthNonuniformity   | 6  | 0.60 | 46  | 7  | 0.68 | 29  |
| 134 | Wavelet_HHL_rgl_runPercentage            | 8  | 0.58 | 130 | 4  | 0.54 | 319 |
| 135 | Wavelet_HHL_rgl_shortRunEmphasis         | 8  | 0.59 | 105 | 4  | 0.54 | 315 |
| 136 | Wavelet_HHL_rgl_shortRunHighGrayLevEmpha | 7  | 0.55 | 370 | 2  | 0.67 | 85  |
| 137 | Wavelet_HHL_rgl_shortRunLowGrayLevEmpha  | 3  | 0.58 | 191 | 8  | 0.71 | 13  |
| 138 | Wavelet_HHL_stats_energy                 | 6  | 0.59 | 70  | 7  | 0.67 | 97  |
| 139 | Wavelet_HHL_stats_entropy                | 8  | 0.59 | 82  | 4  | 0.51 | 412 |
| 140 | Wavelet_HHL_stats_kurtosis               | 10 | 0.60 | 55  | 2  | 0.63 | 171 |
| 141 | Wavelet_HHL_stats_max                    | 10 | 0.57 | 244 | 2  | 0.63 | 168 |
| 142 | Wavelet_HHL_stats_md                     | 11 | 0.57 | 229 | 9  | 0.59 | 211 |
| 143 | Wavelet_HHL_stats_mean                   | 9  | 0.53 | 414 | 3  | 0.52 | 390 |
| 144 | Wavelet_HHL_stats_median                 | 9  | 0.54 | 381 | 3  | 0.67 | 89  |
| 145 | Wavelet_HHL_stats_min                    | 9  | 0.57 | 221 | 12 | 0.58 | 230 |
| 146 | Wavelet_HHL_stats_range                  | 10 | 0.58 | 188 | 2  | 0.61 | 182 |
| 147 | Wavelet_HHL_stats_rms                    | 11 | 0.56 | 283 | 9  | 0.57 | 237 |
| 148 | Wavelet_HHL_stats_skewness               | 10 | 0.52 | 426 | 10 | 0.56 | 266 |

|     |                                          |    |      |     |    |      |     |
|-----|------------------------------------------|----|------|-----|----|------|-----|
| 149 | Wavelet_HHL_stats_std                    | 11 | 0.56 | 286 | 9  | 0.58 | 235 |
| 150 | Wavelet_HHL_stats_totalenergy            | 6  | 0.59 | 81  | 7  | 0.67 | 95  |
| 151 | Wavelet_HHL_stats_uniformity             | 5  | 0.59 | 89  | 11 | 0.52 | 378 |
| 152 | Wavelet_HHL_stats_var                    | 11 | 0.56 | 284 | 9  | 0.58 | 236 |
| 153 | Wavelet_HLH_glcm_autocorr                | 7  | 0.56 | 316 | 2  | 0.65 | 133 |
| 154 | Wavelet_HLH_glcm_clusProm                | 8  | 0.56 | 323 | 4  | 0.63 | 158 |
| 155 | Wavelet_HLH_glcm_clusShade               | 9  | 0.52 | 423 | 3  | 0.54 | 334 |
| 156 | Wavelet_HLH_glcm_clusTend                | 8  | 0.58 | 199 | 4  | 0.58 | 221 |
| 157 | Wavelet_HLH_glcm_contrast                | 8  | 0.57 | 228 | 4  | 0.58 | 220 |
| 158 | Wavelet_HLH_glcm_correl1                 | 9  | 0.54 | 382 | 10 | 0.52 | 389 |
| 159 | Wavelet_HLH_glcm_diffEntro               | 8  | 0.58 | 196 | 4  | 0.53 | 336 |
| 160 | Wavelet_HLH_glcm_dissimilar              | 8  | 0.58 | 189 | 4  | 0.54 | 328 |
| 161 | Wavelet_HLH_glcm_energy                  | 5  | 0.58 | 201 | 11 | 0.50 | 427 |
| 162 | Wavelet_HLH_glcm_entrop2                 | 8  | 0.57 | 259 | 4  | 0.55 | 301 |
| 163 | Wavelet_HLH_glcm_homogeneity1            | 5  | 0.58 | 184 | 11 | 0.50 | 431 |
| 164 | Wavelet_HLH_glcm_homogeneity2            | 5  | 0.58 | 186 | 11 | 0.50 | 425 |
| 165 | Wavelet_HLH_glcm_infoCorr1               | 1  | 0.58 | 160 | 6  | 0.61 | 192 |
| 166 | Wavelet_HLH_glcm_infoCorr2               | 4  | 0.59 | 71  | 9  | 0.55 | 285 |
| 167 | Wavelet_HLH_glcm_invDiffmomnor           | 1  | 0.60 | 19  | 6  | 0.66 | 112 |
| 168 | Wavelet_HLH_glcm_invDiffnorm             | 1  | 0.60 | 27  | 6  | 0.66 | 123 |
| 169 | Wavelet_HLH_glcm_inverseVar              | 5  | 0.58 | 185 | 3  | 0.54 | 314 |
| 170 | Wavelet_HLH_glcm_maxProb                 | 5  | 0.57 | 246 | 11 | 0.52 | 384 |
| 171 | Wavelet_HLH_glcm_sumAvg                  | 7  | 0.56 | 313 | 2  | 0.65 | 131 |
| 172 | Wavelet_HLH_glcm_sumEntro                | 8  | 0.58 | 162 | 4  | 0.53 | 339 |
| 173 | Wavelet_HLH_glcm_sumSquares              | 7  | 0.56 | 327 | 2  | 0.65 | 134 |
| 174 | Wavelet_HLH_glcm_sumVar                  | 7  | 0.56 | 309 | 2  | 0.65 | 137 |
| 175 | Wavelet_HLH_rgl_grayLevelNonuniformity   | 6  | 0.61 | 1   | 7  | 0.67 | 84  |
| 176 | Wavelet_HLH_rgl_highGrayLevelRunEmphasis | 7  | 0.56 | 335 | 2  | 0.65 | 132 |
| 177 | Wavelet_HLH_rgl_longRunEmphasis          | 5  | 0.59 | 119 | 11 | 0.55 | 294 |
| 178 | Wavelet_HLH_rgl_longRunHighGrayLevEmpha  | 10 | 0.57 | 231 | 2  | 0.65 | 146 |
| 179 | Wavelet_HLH_rgl_longRunLowGrayLevEmpha   | 3  | 0.55 | 358 | 8  | 0.66 | 115 |



|     |                                          |    |      |     |    |      |     |
|-----|------------------------------------------|----|------|-----|----|------|-----|
| 180 | Wavelet_HLH_rgl_lowGrayLevelRunEmphasis  | 3  | 0.57 | 216 | 8  | 0.71 | 14  |
| 181 | Wavelet_HLH_rgl_runLengthNonuniformity   | 6  | 0.60 | 41  | 7  | 0.69 | 20  |
| 182 | Wavelet_HLH_rgl_runPercentage            | 8  | 0.59 | 103 | 4  | 0.54 | 304 |
| 183 | Wavelet_HLH_rgl_shortRunEmphasis         | 8  | 0.59 | 114 | 4  | 0.53 | 345 |
| 184 | Wavelet_HLH_rgl_shortRunHighGrayLevEmpha | 7  | 0.55 | 361 | 2  | 0.65 | 142 |
| 185 | Wavelet_HLH_rgl_shortRunLowGrayLevEmpha  | 3  | 0.58 | 197 | 8  | 0.73 | 9   |
| 186 | Wavelet_HLH_stats_energy                 | 6  | 0.59 | 110 | 7  | 0.68 | 50  |
| 187 | Wavelet_HLH_stats_entropy                | 8  | 0.58 | 151 | 4  | 0.51 | 400 |
| 188 | Wavelet_HLH_stats_kurtosis               | 10 | 0.58 | 132 | 5  | 0.61 | 196 |
| 189 | Wavelet_HLH_stats_max                    | 10 | 0.56 | 281 | 2  | 0.63 | 170 |
| 190 | Wavelet_HLH_stats_md                     | 11 | 0.57 | 227 | 13 | 0.56 | 273 |
| 191 | Wavelet_HLH_stats_mean                   | 9  | 0.52 | 425 | 3  | 0.51 | 401 |
| 192 | Wavelet_HLH_stats_median                 | 9  | 0.53 | 409 | 3  | 0.55 | 295 |
| 193 | Wavelet_HLH_stats_min                    | 9  | 0.55 | 347 | 12 | 0.59 | 212 |
| 194 | Wavelet_HLH_stats_range                  | 10 | 0.56 | 290 | 2  | 0.61 | 184 |
| 195 | Wavelet_HLH_stats_rms                    | 11 | 0.56 | 278 | 13 | 0.52 | 370 |
| 196 | Wavelet_HLH_stats_skewness               | 10 | 0.51 | 432 | 3  | 0.55 | 292 |
| 197 | Wavelet_HLH_stats_std                    | 11 | 0.56 | 276 | 13 | 0.52 | 374 |
| 198 | Wavelet_HLH_stats_totalenergy            | 6  | 0.58 | 127 | 7  | 0.68 | 47  |
| 199 | Wavelet_HLH_stats_uniformity             | 5  | 0.58 | 140 | 11 | 0.51 | 405 |
| 200 | Wavelet_HLH_stats_var                    | 11 | 0.56 | 277 | 13 | 0.52 | 372 |
| 201 | Wavelet_HLL_glcm_autocorr                | 7  | 0.55 | 372 | 2  | 0.63 | 162 |
| 202 | Wavelet_HLL_glcm_clusProm                | 8  | 0.56 | 331 | 4  | 0.60 | 202 |
| 203 | Wavelet_HLL_glcm_clusShade               | 9  | 0.52 | 424 | 10 | 0.61 | 183 |
| 204 | Wavelet_HLL_glcm_clusTend                | 4  | 0.58 | 165 | 4  | 0.53 | 350 |
| 205 | Wavelet_HLL_glcm_contrast                | 4  | 0.58 | 159 | 4  | 0.53 | 340 |
| 206 | Wavelet_HLL_glcm_correl1                 | 9  | 0.54 | 399 | 10 | 0.57 | 255 |
| 207 | Wavelet_HLL_glcm_diffEntro               | 4  | 0.59 | 69  | 4  | 0.52 | 379 |
| 208 | Wavelet_HLL_glcm_dissimilar              | 4  | 0.59 | 80  | 4  | 0.51 | 392 |
| 209 | Wavelet_HLL_glcm_energy                  | 5  | 0.60 | 48  | 11 | 0.55 | 299 |
| 210 | Wavelet_HLL_glcm_entrop2                 | 4  | 0.59 | 108 | 4  | 0.50 | 434 |

|     |                                           |    |      |     |    |      |     |
|-----|-------------------------------------------|----|------|-----|----|------|-----|
| 211 | Wavelet_HLL_glcm_homogeneity1             | 1  | 0.60 | 49  | 11 | 0.55 | 288 |
| 212 | Wavelet_HLL_glcm_homogeneity2             | 1  | 0.60 | 50  | 11 | 0.55 | 280 |
| 213 | Wavelet_HLL_glcm_infoCorr1                | 1  | 0.54 | 384 | 6  | 0.60 | 198 |
| 214 | Wavelet_HLL_glcm_infoCorr2                | 4  | 0.58 | 153 | 9  | 0.57 | 240 |
| 215 | Wavelet_HLL_glcm_invDiffmomnor            | 1  | 0.60 | 20  | 6  | 0.68 | 30  |
| 216 | Wavelet_HLL_glcm_invDiffnorm              | 1  | 0.61 | 12  | 6  | 0.65 | 140 |
| 217 | Wavelet_HLL_glcm_inverseVar               | 1  | 0.59 | 61  | 3  | 0.58 | 219 |
| 218 | Wavelet_HLL_glcm_maxProb                  | 5  | 0.59 | 65  | 11 | 0.54 | 313 |
| 219 | Wavelet_HLL_glcm_sumAvg                   | 7  | 0.55 | 366 | 2  | 0.63 | 160 |
| 220 | Wavelet_HLL_glcm_sumEntro                 | 4  | 0.59 | 72  | 4  | 0.52 | 377 |
| 221 | Wavelet_HLL_glcm_sumSquares               | 7  | 0.53 | 401 | 2  | 0.63 | 165 |
| 222 | Wavelet_HLL_glcm_sumVar                   | 7  | 0.55 | 365 | 2  | 0.63 | 157 |
| 223 | Wavelet_HLL_rigl_grayLevelNonuniformity   | 6  | 0.61 | 4   | 7  | 0.67 | 76  |
| 224 | Wavelet_HLL_rigl_highGrayLevelRunEmphasis | 7  | 0.54 | 391 | 2  | 0.63 | 159 |
| 225 | Wavelet_HLL_rigl_longRunEmphasis          | 5  | 0.60 | 38  | 11 | 0.57 | 241 |
| 226 | Wavelet_HLL_rigl_longRunHighGrayLevEmpha  | 10 | 0.59 | 79  | 2  | 0.65 | 138 |
| 227 | Wavelet_HLL_rigl_longRunLowGrayLevEmpha   | 3  | 0.52 | 420 | 8  | 0.61 | 190 |
| 228 | Wavelet_HLL_rigl_lowGrayLevelRunEmphasis  | 3  | 0.58 | 176 | 8  | 0.66 | 113 |
| 229 | Wavelet_HLL_rigl_runLengthNonuniformity   | 6  | 0.60 | 51  | 7  | 0.68 | 51  |
| 230 | Wavelet_HLL_rigl_runPercentage            | 4  | 0.60 | 34  | 4  | 0.58 | 232 |
| 231 | Wavelet_HLL_rigl_shortRunEmphasis         | 4  | 0.60 | 30  | 4  | 0.57 | 239 |
| 232 | Wavelet_HLL_rigl_shortRunHighGrayLevEmpha | 7  | 0.53 | 412 | 2  | 0.62 | 172 |
| 233 | Wavelet_HLL_rigl_shortRunLowGrayLevEmpha  | 3  | 0.58 | 129 | 8  | 0.68 | 72  |
| 234 | Wavelet_HLL_stats_energy                  | 6  | 0.59 | 99  | 7  | 0.68 | 74  |
| 235 | Wavelet_HLL_stats_entropy                 | 4  | 0.60 | 54  | 4  | 0.52 | 365 |
| 236 | Wavelet_HLL_stats_kurtosis                | 10 | 0.60 | 35  | 5  | 0.63 | 169 |
| 237 | Wavelet_HLL_stats_max                     | 10 | 0.58 | 206 | 2  | 0.68 | 70  |
| 238 | Wavelet_HLL_stats_md                      | 4  | 0.59 | 86  | 9  | 0.58 | 227 |
| 239 | Wavelet_HLL_stats_mean                    | 1  | 0.59 | 91  | 6  | 0.69 | 21  |
| 240 | Wavelet_HLL_stats_median                  | 1  | 0.59 | 97  | 6  | 0.63 | 163 |
| 241 | Wavelet_HLL_stats_min                     | 9  | 0.55 | 363 | 12 | 0.62 | 180 |

|     |                                          |    |      |     |    |      |     |
|-----|------------------------------------------|----|------|-----|----|------|-----|
| 242 | Wavelet_HLL_stats_range                  | 10 | 0.58 | 194 | 2  | 0.66 | 109 |
| 243 | Wavelet_HLL_stats_rms                    | 4  | 0.58 | 144 | 9  | 0.54 | 303 |
| 244 | Wavelet_HLL_stats_skewness               | 9  | 0.54 | 396 | 10 | 0.63 | 164 |
| 245 | Wavelet_HLL_stats_std                    | 4  | 0.58 | 154 | 9  | 0.54 | 317 |
| 246 | Wavelet_HLL_stats_totalenergy            | 6  | 0.59 | 106 | 7  | 0.68 | 71  |
| 247 | Wavelet_HLL_stats_uniformity             | 5  | 0.60 | 39  | 11 | 0.55 | 298 |
| 248 | Wavelet_HLL_stats_var                    | 4  | 0.58 | 155 | 9  | 0.54 | 318 |
| 249 | Wavelet_LHH_glcm_autocorr                | 7  | 0.56 | 282 | 2  | 0.67 | 81  |
| 250 | Wavelet_LHH_glcm_clusProm                | 8  | 0.57 | 265 | 4  | 0.61 | 193 |
| 251 | Wavelet_LHH_glcm_clusShade               | 9  | 0.50 | 439 | 3  | 0.51 | 410 |
| 252 | Wavelet_LHH_glcm_clusTend                | 8  | 0.57 | 213 | 4  | 0.55 | 290 |
| 253 | Wavelet_LHH_glcm_contrast                | 8  | 0.56 | 269 | 4  | 0.55 | 279 |
| 254 | Wavelet_LHH_glcm_correl1                 | 9  | 0.56 | 270 | 10 | 0.51 | 408 |
| 255 | Wavelet_LHH_glcm_diffEntro               | 8  | 0.56 | 274 | 4  | 0.55 | 287 |
| 256 | Wavelet_LHH_glcm_dissimilar              | 8  | 0.56 | 288 | 4  | 0.54 | 305 |
| 257 | Wavelet_LHH_glcm_energy                  | 5  | 0.55 | 374 | 11 | 0.57 | 247 |
| 258 | Wavelet_LHH_glcm_entrop2                 | 8  | 0.55 | 376 | 4  | 0.58 | 222 |
| 259 | Wavelet_LHH_glcm_homogeneity1            | 5  | 0.56 | 341 | 11 | 0.55 | 282 |
| 260 | Wavelet_LHH_glcm_homogeneity2            | 5  | 0.55 | 344 | 11 | 0.55 | 284 |
| 261 | Wavelet_LHH_glcm_infoCorr1               | 1  | 0.59 | 88  | 6  | 0.62 | 177 |
| 262 | Wavelet_LHH_glcm_infoCorr2               | 4  | 0.60 | 47  | 9  | 0.56 | 261 |
| 263 | Wavelet_LHH_glcm_invDiffmomnor           | 1  | 0.59 | 115 | 6  | 0.72 | 11  |
| 264 | Wavelet_LHH_glcm_invDiffnorm             | 1  | 0.58 | 156 | 6  | 0.69 | 23  |
| 265 | Wavelet_LHH_glcm_inverseVar              | 5  | 0.56 | 333 | 11 | 0.55 | 296 |
| 266 | Wavelet_LHH_glcm_maxProb                 | 5  | 0.53 | 404 | 11 | 0.58 | 234 |
| 267 | Wavelet_LHH_glcm_sumAvg                  | 7  | 0.56 | 280 | 2  | 0.67 | 80  |
| 268 | Wavelet_LHH_glcm_sumEntro                | 8  | 0.57 | 240 | 4  | 0.55 | 289 |
| 269 | Wavelet_LHH_glcm_sumSquares              | 7  | 0.56 | 294 | 2  | 0.67 | 83  |
| 270 | Wavelet_LHH_glcm_sumVar                  | 7  | 0.56 | 273 | 2  | 0.67 | 79  |
| 271 | Wavelet_LHH_rgl_grayLevelNonuniformity   | 6  | 0.61 | 10  | 7  | 0.67 | 107 |
| 272 | Wavelet_LHH_rgl_highGrayLevelRunEmphasis | 7  | 0.56 | 291 | 2  | 0.67 | 82  |

|     |                                          |    |      |     |    |      |     |
|-----|------------------------------------------|----|------|-----|----|------|-----|
| 273 | Wavelet_LHH_rgl_longRunEmphasis          | 5  | 0.57 | 256 | 11 | 0.51 | 414 |
| 274 | Wavelet_LHH_rgl_longRunHighGrayLevEmpha  | 10 | 0.57 | 239 | 2  | 0.69 | 22  |
| 275 | Wavelet_LHH_rgl_longRunLowGrayLevEmpha   | 3  | 0.56 | 302 | 8  | 0.68 | 33  |
| 276 | Wavelet_LHH_rgl_lowGrayLevelRunEmphasis  | 3  | 0.57 | 219 | 8  | 0.67 | 90  |
| 277 | Wavelet_LHH_rgl_runLengthNonuniformity   | 6  | 0.60 | 32  | 7  | 0.68 | 37  |
| 278 | Wavelet_LHH_rgl_runPercentage            | 8  | 0.57 | 251 | 4  | 0.51 | 422 |
| 279 | Wavelet_LHH_rgl_shortRunEmphasis         | 8  | 0.57 | 248 | 4  | 0.51 | 403 |
| 280 | Wavelet_LHH_rgl_shortRunHighGrayLevEmpha | 7  | 0.56 | 314 | 2  | 0.67 | 88  |
| 281 | Wavelet_LHH_rgl_shortRunLowGrayLevEmpha  | 3  | 0.58 | 203 | 8  | 0.67 | 105 |
| 282 | Wavelet_LHH_stats_energy                 | 6  | 0.59 | 83  | 7  | 0.68 | 49  |
| 283 | Wavelet_LHH_stats_entropy                | 8  | 0.57 | 241 | 4  | 0.54 | 322 |
| 284 | Wavelet_LHH_stats_kurtosis               | 10 | 0.55 | 346 | 2  | 0.62 | 174 |
| 285 | Wavelet_LHH_stats_max                    | 10 | 0.56 | 322 | 2  | 0.60 | 207 |
| 286 | Wavelet_LHH_stats_md                     | 11 | 0.53 | 410 | 9  | 0.58 | 224 |
| 287 | Wavelet_LHH_stats_mean                   | 3  | 0.55 | 364 | 9  | 0.60 | 201 |
| 288 | Wavelet_LHH_stats_median                 | 3  | 0.50 | 435 | 9  | 0.54 | 329 |
| 289 | Wavelet_LHH_stats_min                    | 9  | 0.56 | 285 | 12 | 0.61 | 188 |
| 290 | Wavelet_LHH_stats_range                  | 10 | 0.56 | 279 | 2  | 0.61 | 186 |
| 291 | Wavelet_LHH_stats_rms                    | 11 | 0.53 | 418 | 9  | 0.57 | 260 |
| 292 | Wavelet_LHH_stats_skewness               | 9  | 0.53 | 400 | 12 | 0.51 | 419 |
| 293 | Wavelet_LHH_stats_std                    | 11 | 0.53 | 417 | 9  | 0.56 | 263 |
| 294 | Wavelet_LHH_stats_totalenergy            | 6  | 0.59 | 87  | 7  | 0.68 | 38  |
| 295 | Wavelet_LHH_stats_uniformity             | 5  | 0.56 | 268 | 11 | 0.54 | 310 |
| 296 | Wavelet_LHH_stats_var                    | 11 | 0.53 | 416 | 9  | 0.56 | 262 |
| 297 | Wavelet_LHL_glcm_autocorr                | 7  | 0.55 | 362 | 2  | 0.65 | 128 |
| 298 | Wavelet_LHL_glcm_clusProm                | 8  | 0.56 | 320 | 4  | 0.59 | 213 |
| 299 | Wavelet_LHL_glcm_clusShade               | 9  | 0.52 | 419 | 10 | 0.52 | 364 |
| 300 | Wavelet_LHL_glcm_clusTend                | 8  | 0.58 | 126 | 4  | 0.53 | 360 |
| 301 | Wavelet_LHL_glcm_contrast                | 8  | 0.58 | 183 | 4  | 0.53 | 341 |
| 302 | Wavelet_LHL_glcm_correl1                 | 9  | 0.55 | 353 | 10 | 0.53 | 338 |
| 303 | Wavelet_LHL_glcm_diffEntro               | 8  | 0.58 | 136 | 4  | 0.50 | 428 |

|     |                                          |    |      |     |    |      |     |
|-----|------------------------------------------|----|------|-----|----|------|-----|
| 304 | Wavelet_LHL_glcm_dissimilar              | 8  | 0.58 | 145 | 4  | 0.50 | 439 |
| 305 | Wavelet_LHL_glcm_energy                  | 5  | 0.58 | 166 | 11 | 0.51 | 415 |
| 306 | Wavelet_LHL_glcm_entrop2                 | 8  | 0.58 | 169 | 4  | 0.53 | 343 |
| 307 | Wavelet_LHL_glcm_homogeneity1            | 5  | 0.58 | 171 | 11 | 0.51 | 409 |
| 308 | Wavelet_LHL_glcm_homogeneity2            | 5  | 0.58 | 178 | 11 | 0.51 | 418 |
| 309 | Wavelet_LHL_glcm_infoCorr1               | 1  | 0.58 | 193 | 6  | 0.61 | 189 |
| 310 | Wavelet_LHL_glcm_infoCorr2               | 4  | 0.59 | 94  | 9  | 0.56 | 278 |
| 311 | Wavelet_LHL_glcm_invDiffmomnor           | 1  | 0.59 | 67  | 6  | 0.73 | 7   |
| 312 | Wavelet_LHL_glcm_invDiffnorm             | 1  | 0.59 | 74  | 6  | 0.66 | 116 |
| 313 | Wavelet_LHL_glcm_inverseVar              | 1  | 0.58 | 138 | 3  | 0.56 | 265 |
| 314 | Wavelet_LHL_glcm_maxProb                 | 5  | 0.58 | 202 | 11 | 0.51 | 420 |
| 315 | Wavelet_LHL_glcm_sumAvg                  | 7  | 0.55 | 357 | 2  | 0.65 | 129 |
| 316 | Wavelet_LHL_glcm_sumEntro                | 8  | 0.59 | 98  | 4  | 0.50 | 435 |
| 317 | Wavelet_LHL_glcm_sumSquares              | 7  | 0.55 | 371 | 2  | 0.65 | 136 |
| 318 | Wavelet_LHL_glcm_sumVar                  | 7  | 0.55 | 351 | 2  | 0.65 | 130 |
| 319 | Wavelet_LHL_rgl_grayLevelNonuniformity   | 6  | 0.61 | 11  | 7  | 0.67 | 87  |
| 320 | Wavelet_LHL_rgl_highGrayLevelRunEmphasis | 7  | 0.55 | 375 | 2  | 0.65 | 135 |
| 321 | Wavelet_LHL_rgl_longRunEmphasis          | 5  | 0.58 | 182 | 11 | 0.54 | 316 |
| 322 | Wavelet_LHL_rgl_longRunHighGrayLevEmpha  | 10 | 0.57 | 217 | 2  | 0.65 | 139 |
| 323 | Wavelet_LHL_rgl_longRunLowGrayLevEmpha   | 3  | 0.54 | 385 | 8  | 0.66 | 119 |
| 324 | Wavelet_LHL_rgl_lowGrayLevelRunEmphasis  | 3  | 0.57 | 255 | 8  | 0.73 | 10  |
| 325 | Wavelet_LHL_rgl_runLengthNonuniformity   | 6  | 0.60 | 36  | 7  | 0.69 | 25  |
| 326 | Wavelet_LHL_rgl_runPercentage            | 8  | 0.58 | 163 | 4  | 0.54 | 321 |
| 327 | Wavelet_LHL_rgl_shortRunEmphasis         | 8  | 0.58 | 146 | 4  | 0.53 | 342 |
| 328 | Wavelet_LHL_rgl_shortRunHighGrayLevEmpha | 7  | 0.54 | 388 | 2  | 0.65 | 143 |
| 329 | Wavelet_LHL_rgl_shortRunLowGrayLevEmpha  | 3  | 0.57 | 238 | 8  | 0.75 | 5   |
| 330 | Wavelet_LHL_stats_energy                 | 6  | 0.59 | 121 | 7  | 0.68 | 48  |
| 331 | Wavelet_LHL_stats_entropy                | 8  | 0.59 | 93  | 4  | 0.50 | 432 |
| 332 | Wavelet_LHL_stats_kurtosis               | 10 | 0.59 | 73  | 5  | 0.61 | 181 |
| 333 | Wavelet_LHL_stats_max                    | 10 | 0.55 | 360 | 2  | 0.61 | 187 |
| 334 | Wavelet_LHL_stats_md                     | 11 | 0.58 | 181 | 9  | 0.59 | 214 |

|     |                                |    |      |     |    |      |     |
|-----|--------------------------------|----|------|-----|----|------|-----|
| 335 | Wavelet_LHL_stats_mean         | 1  | 0.61 | 14  | 6  | 0.67 | 96  |
| 336 | Wavelet_LHL_stats_median       | 1  | 0.60 | 29  | 6  | 0.67 | 108 |
| 337 | Wavelet_LHL_stats_min          | 9  | 0.55 | 377 | 12 | 0.59 | 209 |
| 338 | Wavelet_LHL_stats_range        | 10 | 0.56 | 343 | 2  | 0.62 | 179 |
| 339 | Wavelet_LHL_stats_rms          | 11 | 0.57 | 250 | 9  | 0.56 | 264 |
| 340 | Wavelet_LHL_stats_skewness     | 9  | 0.53 | 415 | 10 | 0.50 | 436 |
| 341 | Wavelet_LHL_stats_std          | 11 | 0.57 | 260 | 9  | 0.56 | 269 |
| 342 | Wavelet_LHL_stats_totalenergy  | 6  | 0.58 | 142 | 7  | 0.68 | 42  |
| 343 | Wavelet_LHL_stats_uniformity   | 5  | 0.59 | 100 | 11 | 0.51 | 398 |
| 344 | Wavelet_LHL_stats_var          | 11 | 0.57 | 261 | 9  | 0.56 | 268 |
| 345 | Wavelet_LLH_glcm_autocorr      | 7  | 0.56 | 275 | 2  | 0.68 | 36  |
| 346 | Wavelet_LLH_glcm_clusProm      | 8  | 0.55 | 350 | 4  | 0.64 | 153 |
| 347 | Wavelet_LLH_glcm_clusShade     | 9  | 0.53 | 403 | 10 | 0.56 | 274 |
| 348 | Wavelet_LLH_glcm_clusTend      | 8  | 0.58 | 198 | 4  | 0.58 | 233 |
| 349 | Wavelet_LLH_glcm_contrast      | 8  | 0.57 | 243 | 4  | 0.57 | 254 |
| 350 | Wavelet_LLH_glcm_correl1       | 9  | 0.55 | 378 | 10 | 0.54 | 302 |
| 351 | Wavelet_LLH_glcm_diffEntro     | 8  | 0.58 | 205 | 4  | 0.51 | 406 |
| 352 | Wavelet_LLH_glcm_dissimilar    | 8  | 0.58 | 208 | 4  | 0.51 | 395 |
| 353 | Wavelet_LLH_glcm_energy        | 5  | 0.58 | 200 | 11 | 0.53 | 358 |
| 354 | Wavelet_LLH_glcm_entrop2       | 8  | 0.57 | 235 | 4  | 0.52 | 385 |
| 355 | Wavelet_LLH_glcm_homogeneity1  | 5  | 0.57 | 214 | 11 | 0.52 | 381 |
| 356 | Wavelet_LLH_glcm_homogeneity2  | 5  | 0.57 | 218 | 11 | 0.52 | 373 |
| 357 | Wavelet_LLH_glcm_infoCorr1     | 1  | 0.57 | 215 | 6  | 0.58 | 231 |
| 358 | Wavelet_LLH_glcm_infoCorr2     | 4  | 0.59 | 101 | 9  | 0.54 | 308 |
| 359 | Wavelet_LLH_glcm_invDiffmomnor | 1  | 0.59 | 64  | 6  | 0.64 | 147 |
| 360 | Wavelet_LLH_glcm_invDiffnorm   | 1  | 0.59 | 68  | 6  | 0.63 | 156 |
| 361 | Wavelet_LLH_glcm_inverseVar    | 5  | 0.58 | 172 | 3  | 0.53 | 361 |
| 362 | Wavelet_LLH_glcm_maxProb       | 5  | 0.57 | 252 | 11 | 0.54 | 324 |
| 363 | Wavelet_LLH_glcm_sumAvg        | 7  | 0.56 | 272 | 2  | 0.68 | 35  |
| 364 | Wavelet_LLH_glcm_sumEntro      | 8  | 0.59 | 111 | 4  | 0.50 | 429 |
| 365 | Wavelet_LLH_glcm_sumSquares    | 7  | 0.56 | 295 | 2  | 0.68 | 41  |

|     |                                          |    |      |     |    |      |     |
|-----|------------------------------------------|----|------|-----|----|------|-----|
| 366 | Wavelet_LLH_glcm_sumVar                  | 7  | 0.56 | 267 | 2  | 0.68 | 31  |
| 367 | Wavelet_LLH_rgl_grayLevelNonuniformity   | 6  | 0.61 | 6   | 7  | 0.67 | 86  |
| 368 | Wavelet_LLH_rgl_highGrayLevelRunEmphasis | 7  | 0.56 | 296 | 2  | 0.68 | 52  |
| 369 | Wavelet_LLH_rgl_longRunEmphasis          | 5  | 0.58 | 195 | 11 | 0.57 | 249 |
| 370 | Wavelet_LLH_rgl_longRunHighGrayLevEmpha  | 10 | 0.58 | 152 | 2  | 0.69 | 26  |
| 371 | Wavelet_LLH_rgl_longRunLowGrayLevEmpha   | 3  | 0.55 | 348 | 8  | 0.67 | 78  |
| 372 | Wavelet_LLH_rgl_lowGrayLevelRunEmphasis  | 3  | 0.57 | 211 | 8  | 0.78 | 1   |
| 373 | Wavelet_LLH_rgl_runLengthNonuniformity   | 6  | 0.60 | 44  | 7  | 0.69 | 24  |
| 374 | Wavelet_LLH_rgl_runPercentage            | 8  | 0.58 | 179 | 4  | 0.57 | 259 |
| 375 | Wavelet_LLH_rgl_shortRunEmphasis         | 8  | 0.58 | 168 | 4  | 0.55 | 283 |
| 376 | Wavelet_LLH_rgl_shortRunHighGrayLevEmpha | 7  | 0.55 | 345 | 2  | 0.67 | 77  |
| 377 | Wavelet_LLH_rgl_shortRunLowGrayLevEmpha  | 3  | 0.58 | 187 | 8  | 0.77 | 2   |
| 378 | Wavelet_LLH_stats_energy                 | 6  | 0.58 | 164 | 7  | 0.68 | 34  |
| 379 | Wavelet_LLH_stats_entropy                | 8  | 0.59 | 116 | 4  | 0.51 | 411 |
| 380 | Wavelet_LLH_stats_kurtosis               | 10 | 0.59 | 92  | 5  | 0.62 | 176 |
| 381 | Wavelet_LLH_stats_max                    | 10 | 0.54 | 395 | 2  | 0.59 | 208 |
| 382 | Wavelet_LLH_stats_md                     | 11 | 0.59 | 109 | 13 | 0.54 | 312 |
| 383 | Wavelet_LLH_stats_mean                   | 1  | 0.58 | 141 | 1  | 0.57 | 251 |
| 384 | Wavelet_LLH_stats_median                 | 1  | 0.59 | 63  | 1  | 0.60 | 205 |
| 385 | Wavelet_LLH_stats_min                    | 9  | 0.55 | 349 | 12 | 0.68 | 43  |
| 386 | Wavelet_LLH_stats_range                  | 10 | 0.55 | 373 | 2  | 0.65 | 144 |
| 387 | Wavelet_LLH_stats_rms                    | 11 | 0.57 | 212 | 13 | 0.51 | 416 |
| 388 | Wavelet_LLH_stats_skewness               | 9  | 0.56 | 271 | 10 | 0.57 | 250 |
| 389 | Wavelet_LLH_stats_std                    | 11 | 0.57 | 209 | 13 | 0.51 | 397 |
| 390 | Wavelet_LLH_stats_totalenergy            | 6  | 0.58 | 174 | 7  | 0.68 | 28  |
| 391 | Wavelet_LLH_stats_uniformity             | 5  | 0.59 | 125 | 11 | 0.53 | 349 |
| 392 | Wavelet_LLH_stats_var                    | 11 | 0.57 | 210 | 13 | 0.51 | 399 |
| 393 | Wavelet_LLL_glcm_autocorr                | 1  | 0.56 | 304 | 1  | 0.66 | 125 |
| 394 | Wavelet_LLL_glcm_clusProm                | 2  | 0.50 | 436 | 4  | 0.62 | 173 |
| 395 | Wavelet_LLL_glcm_clusShade               | 3  | 0.50 | 438 | 3  | 0.55 | 291 |
| 396 | Wavelet_LLL_glcm_clusTend                | 2  | 0.54 | 387 | 4  | 0.60 | 206 |

|     |                                          |   |      |     |   |      |     |
|-----|------------------------------------------|---|------|-----|---|------|-----|
| 397 | Wavelet_LLL_glcm_contrast                | 4 | 0.59 | 112 | 4 | 0.53 | 348 |
| 398 | Wavelet_LLL_glcm_correl1                 | 1 | 0.57 | 257 | 1 | 0.64 | 155 |
| 399 | Wavelet_LLL_glcm_diffEntro               | 4 | 0.60 | 57  | 4 | 0.52 | 366 |
| 400 | Wavelet_LLL_glcm_dissimilar              | 4 | 0.59 | 60  | 4 | 0.52 | 386 |
| 401 | Wavelet_LLL_glcm_energy                  | 5 | 0.59 | 76  | 5 | 0.52 | 371 |
| 402 | Wavelet_LLL_glcm_entrop2                 | 4 | 0.58 | 133 | 4 | 0.52 | 369 |
| 403 | Wavelet_LLL_glcm_homogeneity1            | 1 | 0.60 | 22  | 5 | 0.56 | 272 |
| 404 | Wavelet_LLL_glcm_homogeneity2            | 1 | 0.60 | 23  | 5 | 0.56 | 271 |
| 405 | Wavelet_LLL_glcm_infoCorr1               | 1 | 0.51 | 430 | 6 | 0.57 | 256 |
| 406 | Wavelet_LLL_glcm_infoCorr2               | 4 | 0.54 | 390 | 4 | 0.53 | 335 |
| 407 | Wavelet_LLL_glcm_invDiffmomnor           | 1 | 0.60 | 56  | 6 | 0.71 | 15  |
| 408 | Wavelet_LLL_glcm_invDiffnorm             | 1 | 0.60 | 40  | 6 | 0.67 | 103 |
| 409 | Wavelet_LLL_glcm_inverseVar              | 1 | 0.57 | 233 | 3 | 0.56 | 267 |
| 410 | Wavelet_LLL_glcm_maxProb                 | 5 | 0.59 | 96  | 5 | 0.53 | 353 |
| 411 | Wavelet_LLL_glcm_sumAvg                  | 1 | 0.56 | 321 | 1 | 0.66 | 126 |
| 412 | Wavelet_LLL_glcm_sumEntro                | 4 | 0.58 | 177 | 4 | 0.53 | 359 |
| 413 | Wavelet_LLL_glcm_sumSquares              | 1 | 0.56 | 312 | 1 | 0.66 | 121 |
| 414 | Wavelet_LLL_glcm_sumVar                  | 1 | 0.56 | 298 | 1 | 0.66 | 122 |
| 415 | Wavelet_LLL_rgl_grayLevelNonuniformity   | 6 | 0.61 | 13  | 7 | 0.68 | 66  |
| 416 | Wavelet_LLL_rgl_highGrayLevelRunEmphasis | 1 | 0.56 | 292 | 1 | 0.66 | 118 |
| 417 | Wavelet_LLL_rgl_longRunEmphasis          | 5 | 0.60 | 28  | 5 | 0.61 | 197 |
| 418 | Wavelet_LLL_rgl_longRunHighGrayLevEmpha  | 5 | 0.59 | 62  | 1 | 0.67 | 99  |
| 419 | Wavelet_LLL_rgl_longRunLowGrayLevEmpha   | 2 | 0.51 | 433 | 8 | 0.63 | 166 |
| 420 | Wavelet_LLL_rgl_lowGrayLevelRunEmphasis  | 2 | 0.56 | 299 | 8 | 0.74 | 6   |
| 421 | Wavelet_LLL_rgl_runLengthNonuniformity   | 6 | 0.59 | 66  | 7 | 0.67 | 93  |
| 422 | Wavelet_LLL_rgl_runPercentage            | 4 | 0.60 | 24  | 9 | 0.60 | 200 |
| 423 | Wavelet_LLL_rgl_shortRunEmphasis         | 4 | 0.60 | 26  | 9 | 0.59 | 217 |
| 424 | Wavelet_LLL_rgl_shortRunHighGrayLevEmpha | 1 | 0.53 | 408 | 1 | 0.64 | 148 |
| 425 | Wavelet_LLL_rgl_shortRunLowGrayLevEmpha  | 2 | 0.57 | 264 | 8 | 0.75 | 4   |
| 426 | Wavelet_LLL_stats_energy                 | 6 | 0.61 | 16  | 7 | 0.68 | 68  |
| 427 | Wavelet_LLL_stats_entropy                | 4 | 0.59 | 118 | 4 | 0.50 | 426 |



|     |                               |   |      |     |   |      |     |
|-----|-------------------------------|---|------|-----|---|------|-----|
| 428 | Wavelet_LLL_stats_kurtosis    | 5 | 0.58 | 150 | 5 | 0.60 | 204 |
| 429 | Wavelet_LLL_stats_max         | 7 | 0.58 | 170 | 2 | 0.66 | 114 |
| 430 | Wavelet_LLL_stats_md          | 2 | 0.56 | 324 | 4 | 0.51 | 423 |
| 431 | Wavelet_LLL_stats_mean        | 1 | 0.59 | 102 | 3 | 0.52 | 388 |
| 432 | Wavelet_LLL_stats_median      | 1 | 0.61 | 9   | 3 | 0.52 | 383 |
| 433 | Wavelet_LLL_stats_min         | 3 | 0.53 | 402 | 8 | 0.65 | 141 |
| 434 | Wavelet_LLL_stats_range       | 7 | 0.57 | 222 | 2 | 0.67 | 106 |
| 435 | Wavelet_LLL_stats_rms         | 1 | 0.59 | 77  | 3 | 0.54 | 325 |
| 436 | Wavelet_LLL_stats_skewness    | 4 | 0.57 | 236 | 3 | 0.53 | 352 |
| 437 | Wavelet_LLL_stats_std         | 2 | 0.54 | 392 | 4 | 0.56 | 277 |
| 438 | Wavelet_LLL_stats_totalenergy | 6 | 0.61 | 18  | 7 | 0.68 | 69  |
| 439 | Wavelet_LLL_stats_uniformity  | 5 | 0.59 | 84  | 5 | 0.52 | 375 |
| 440 | Wavelet_LLL_stats_var         | 2 | 0.54 | 393 | 4 | 0.56 | 276 |
